# Supplementary material for: Pd–IL@H-UiO-66-NH2: a hollow multi-functional hierarchical composite for tandem catalysis
Source: Royal Society of Chemistry journal article supplement (doi:10.1039/d3nj05060b), 2024-01-01
Supplement: d3nj05060b1.pdf [file d3nj05060b1.pdf]

## Supplementary Information

### **Pd-IL@H-UiO-66-NH<sub>2</sub>: A hollow multi-functional hierarchical composite for tandem catalysis**

Ruidong Li <sup>a,‡</sup>, Bo Zhao <sup>b,‡</sup>, Ganggang Chang <sup>a,\*</sup>, Shanchao Ke <sup>a</sup>, Minjie Chen <sup>a</sup>, Didi Dong <sup>a</sup>, Chun Pu <sup>a</sup> and Xiaoyu Yang <sup>a,\*</sup>

*<sup>a</sup> School of Chemistry, Chemical Engineering and Life Science & State Key Laboratory of Advanced Technology for Materials Synthesis and Processing, Wuhan University of Technology, Wuhan 430070, Hubei, China*

*<sup>b</sup> School of Power Engineering, Naval of University of Engineering, Wuhan 430033, Hubei, China*

*\* Corresponding author.*

*E-mail: xyayang@whut.edu.cn, changgang2016@whut.edu.cn (G. G. Chang)*

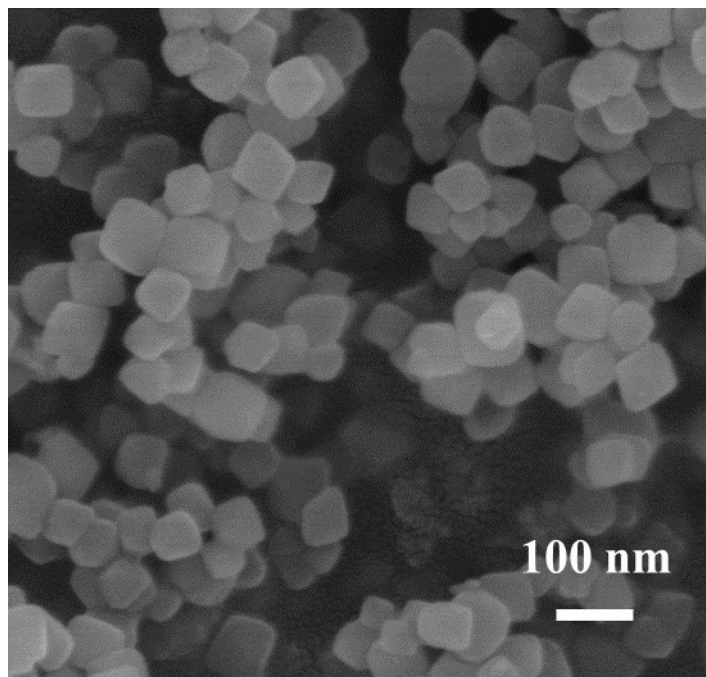

**Figure S1** SEM image of traditional UiO-66-NH<sub>2</sub> (UiO-66-NH<sub>2</sub>-T).

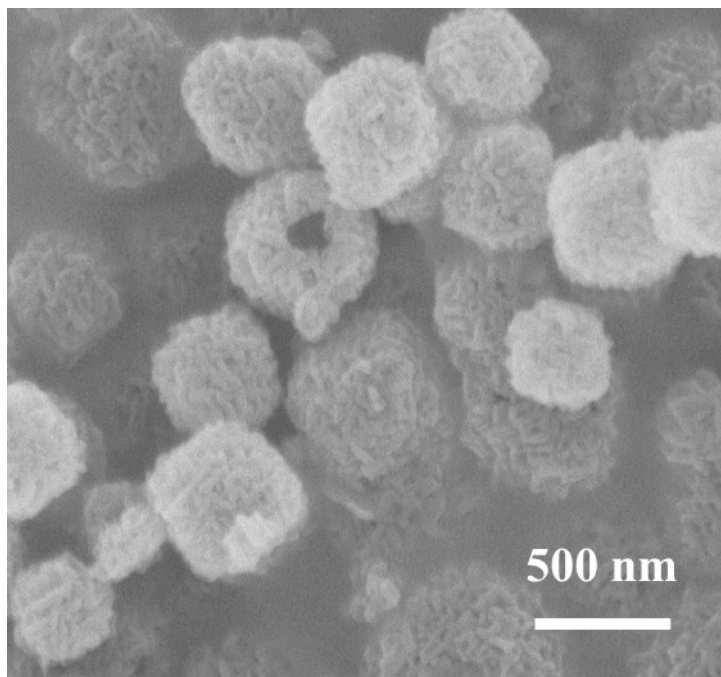

**Figure S2** SEM image of IL@H-UiO-66-NH<sub>2</sub>.

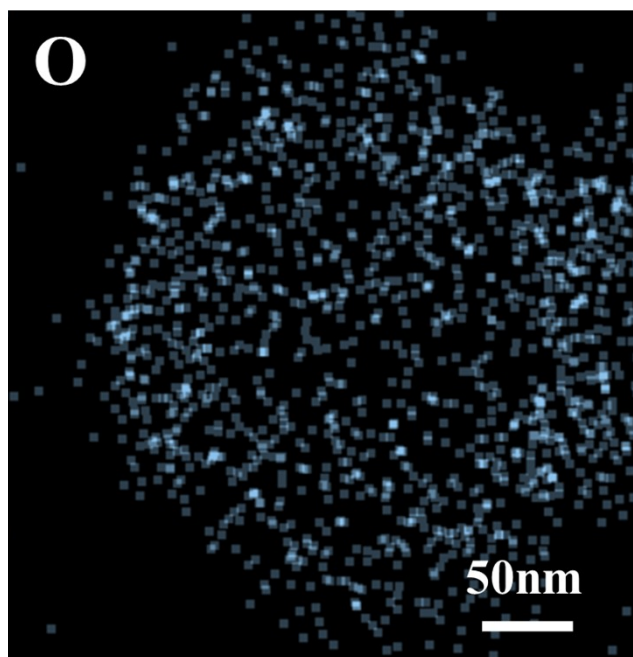

**Figure S3.** EDS elemental mappings of O.

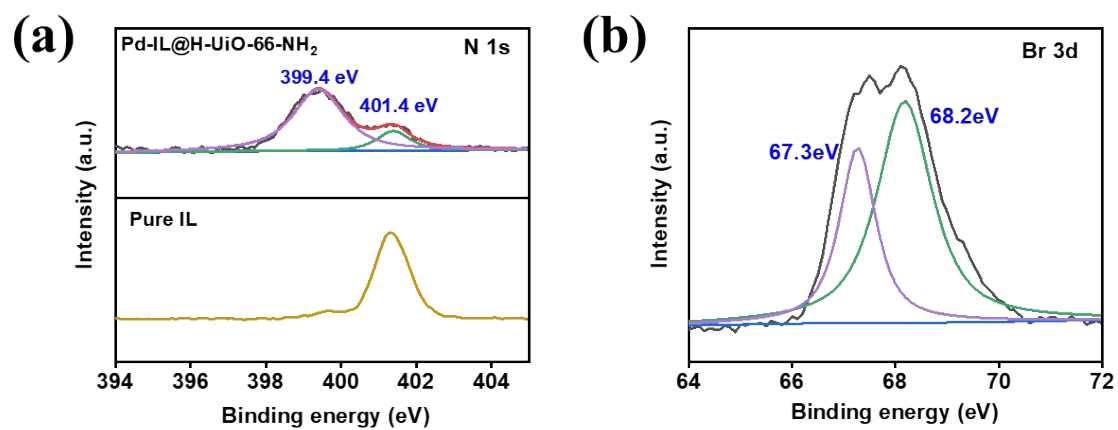

**Figure S4.** (a) High-resolution N 1s XPS spectra of Pd-IL@H-UiO-66-NH<sub>2</sub> and pure IL, (b) Br 3d XPS spectra of Pd-IL@H-UiO-66-NH<sub>2</sub>.

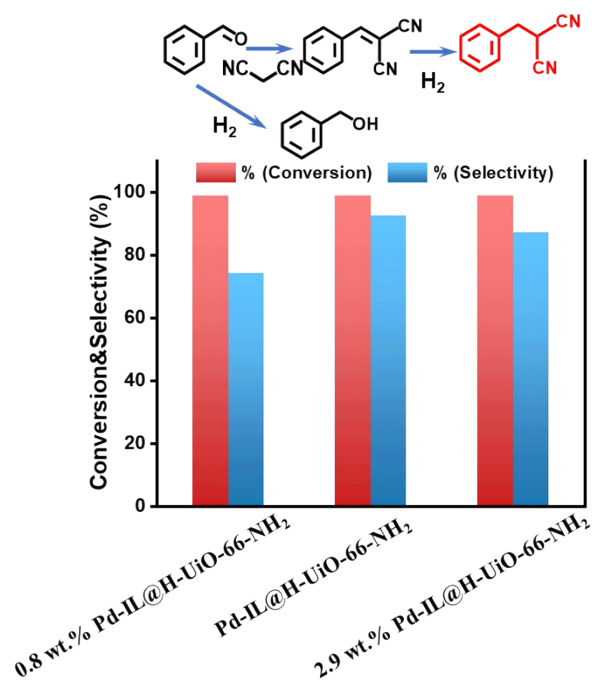

**Figure S5.** The catalysts with different loading of Pd for one-pot Knoevenagel condensation-hydrogenation reaction.

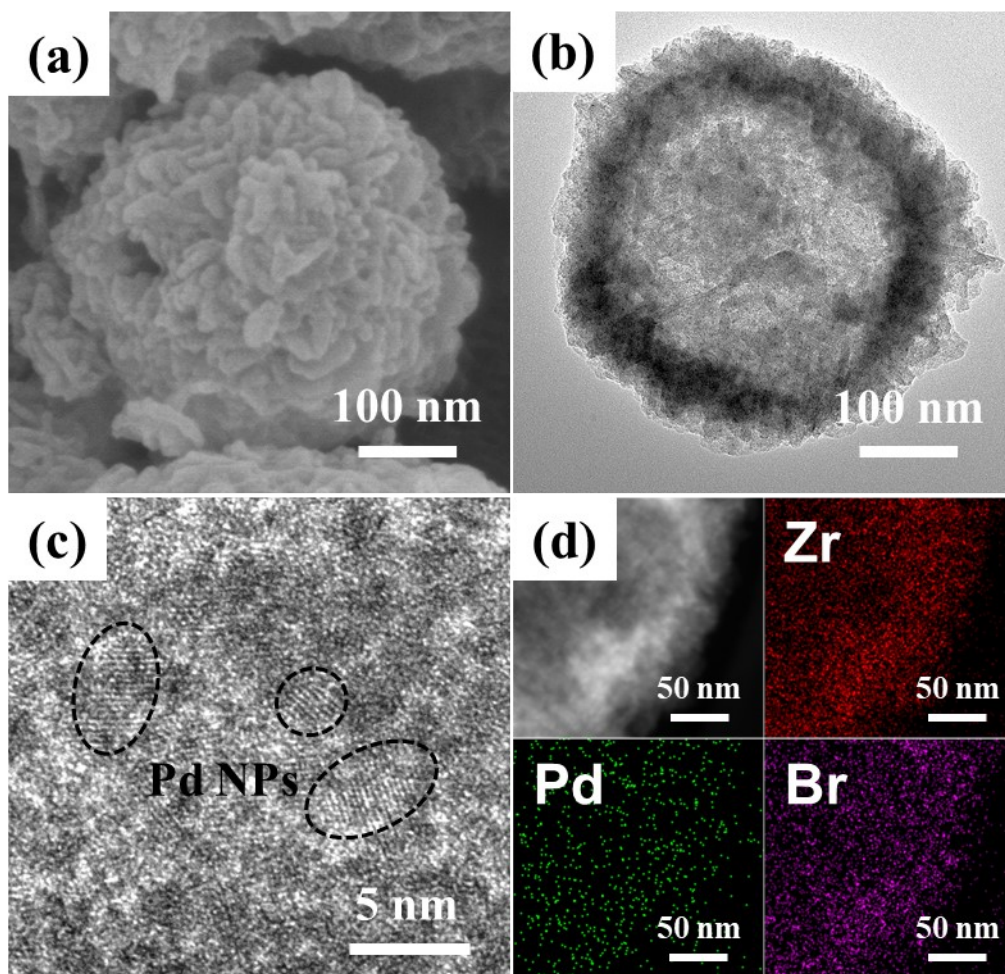

**Figure S6** (a) SEM image of Pd-IL@H-UiO-66-NH<sub>2</sub> after five successive recycles; (b) TEM images of used Pd-IL@H-UiO-66-NH<sub>2</sub>; (c) High resolution TEM images of used Pd-IL@H-UiO-66-NH<sub>2</sub>; (d) HAADF-STEM image of Pd-IL@H-UiO-66-NH<sub>2</sub> after five successive recycles and the corresponding EDS elemental mappings of Pd, Zr and Br.

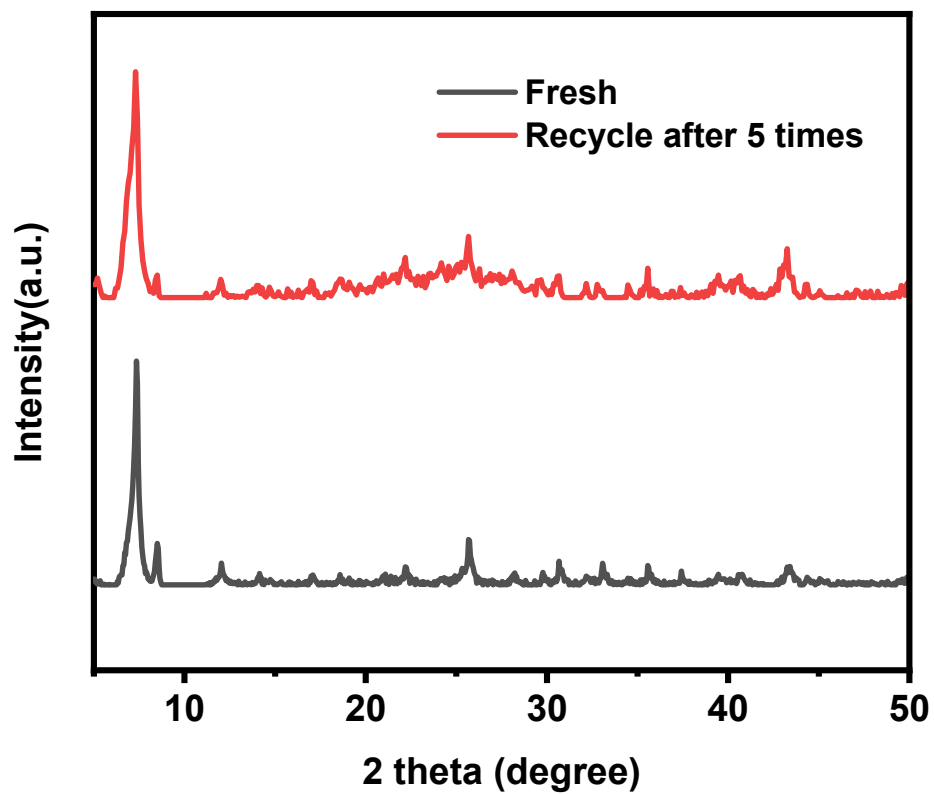

**Figure S7** XRD patterns of Pd-IL@H-UiO-66-NH<sub>2</sub> after reusage for 5 times.



In our reaction system, all substances can be gasified within the programmed temperature range of gas chromatography. Therefore, we chose the relatively convenient GC-MS for calibration and analysis. Wherein, the substrate and by-product was calibrated by standard substances, and the reaction product benzylmalononitrile was analyzed by GC-MS. It has been able to track the substrates, products and by-products in the reaction process in detail. In view of the complexity of tandem catalysis and the small-scale reaction, it is very difficult and beyond our ability to separate pure samples from small amounts of complex mixtures. We have supplemented the detailed GC-MS data and demonstrated the calculation method of the selectivity and conversion in the reaction. The relative data was also added in the revised supporting information and highlighted in yellow.

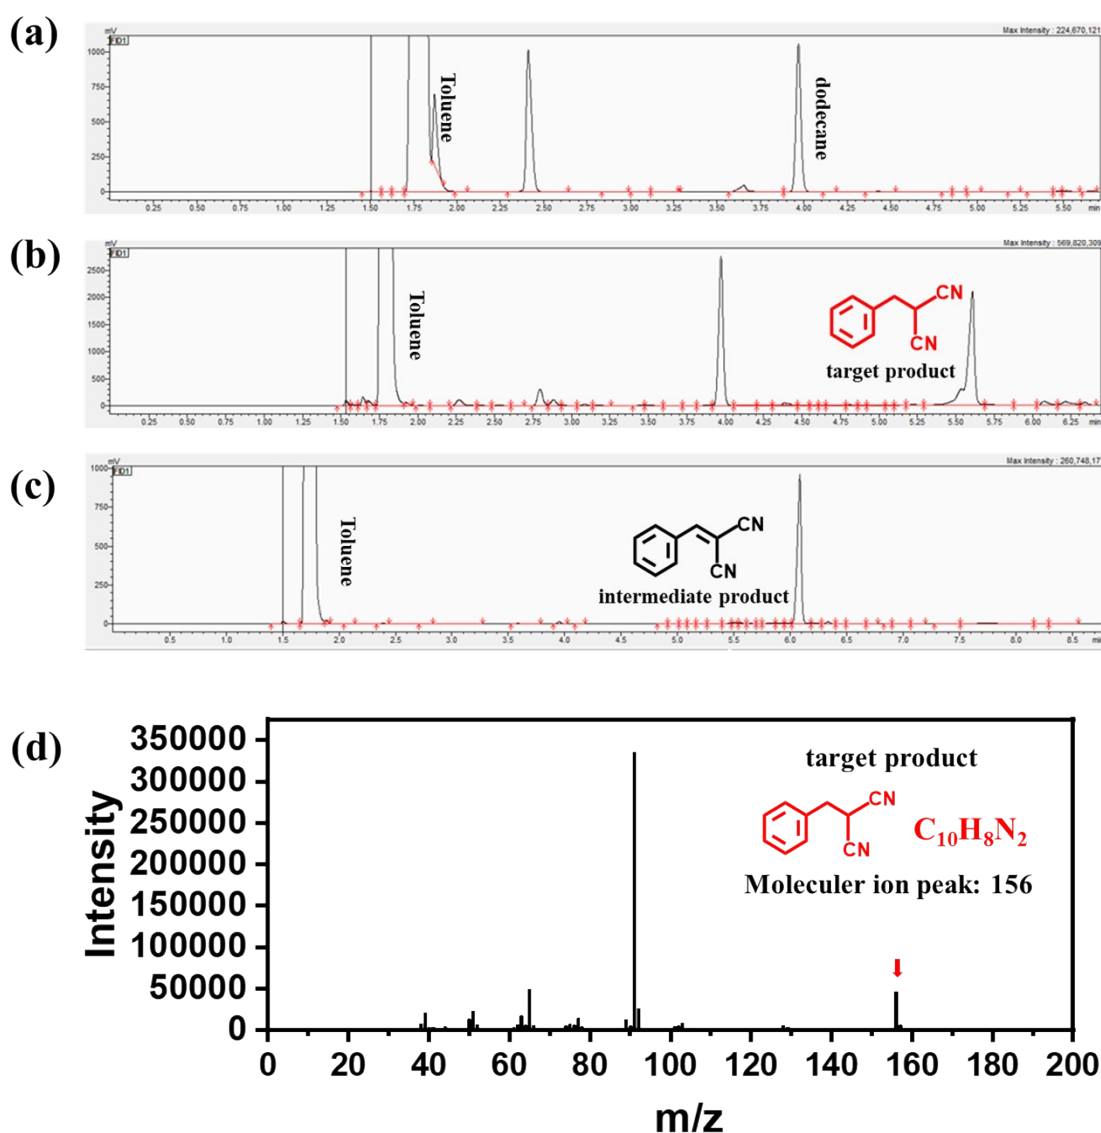

**Figure S8.** Gas chromatogram of mixed substrates: (a) before reaction; (b) after tandem reaction, (c) GC of intermediate product, (d) GC-MS of target product.

**The detailed estimation method of conversion and selectivity:**

$$Con. (\%) = \frac{a - b}{a} \times 100\% \quad (a = S_{\text{benzaldehyde}} / S_{\text{dodecane}} \text{ (Before reaction)}; b = S_{\text{benzaldehyde}} / S_{\text{dodecane}} \text{ (After reaction)})$$

$$Sel. (\%) = \frac{S_{\text{benzylmalonitrile}}}{S_{\text{benzylmalonitrile}} + S_{\text{Byproducts}}} \times 100\%$$

**Table S1.** The specific surface area of the samples.

| <b>Sample</b>                  | <b>Surface Area(m<sup>2</sup>/g)</b> |
|--------------------------------|--------------------------------------|
| UiO-66-NH <sub>2</sub>         | 625                                  |
| IL@UiO-66-NH <sub>2</sub>      | 585                                  |
| IL@H-UiO-66-NH <sub>2</sub>    | 329                                  |
| Pd-IL@H-UiO-66-NH <sub>2</sub> | 435                                  |

**Table S2:** ICP catalyst Pd-IL@H-UiO-66-NH<sub>2</sub> before and after the one-pot Knoevenagel condensation-hydrogenation reaction.

| <b>Ru content (wt.%)</b> | <b>Pd-IL@H-UiO-66-NH<sub>2</sub></b> |
|--------------------------|--------------------------------------|
| Before the reaction      | 1.9                                  |
| After the 5 cycles       | 1.7                                  |
